# Supplementary material for: Identification of Onosma visianii Roots Extract and Purified Shikonin Derivatives as Potential Acaricidal Agents against Tetranychus urticae
Source: PubMed Central journal article supplement (PMC6152756; doi:10.3390/molecules22061002), 2017-06-16
Supplement: molecules-22-01002-s001.pdf [file molecules-22-01002-s001.pdf]

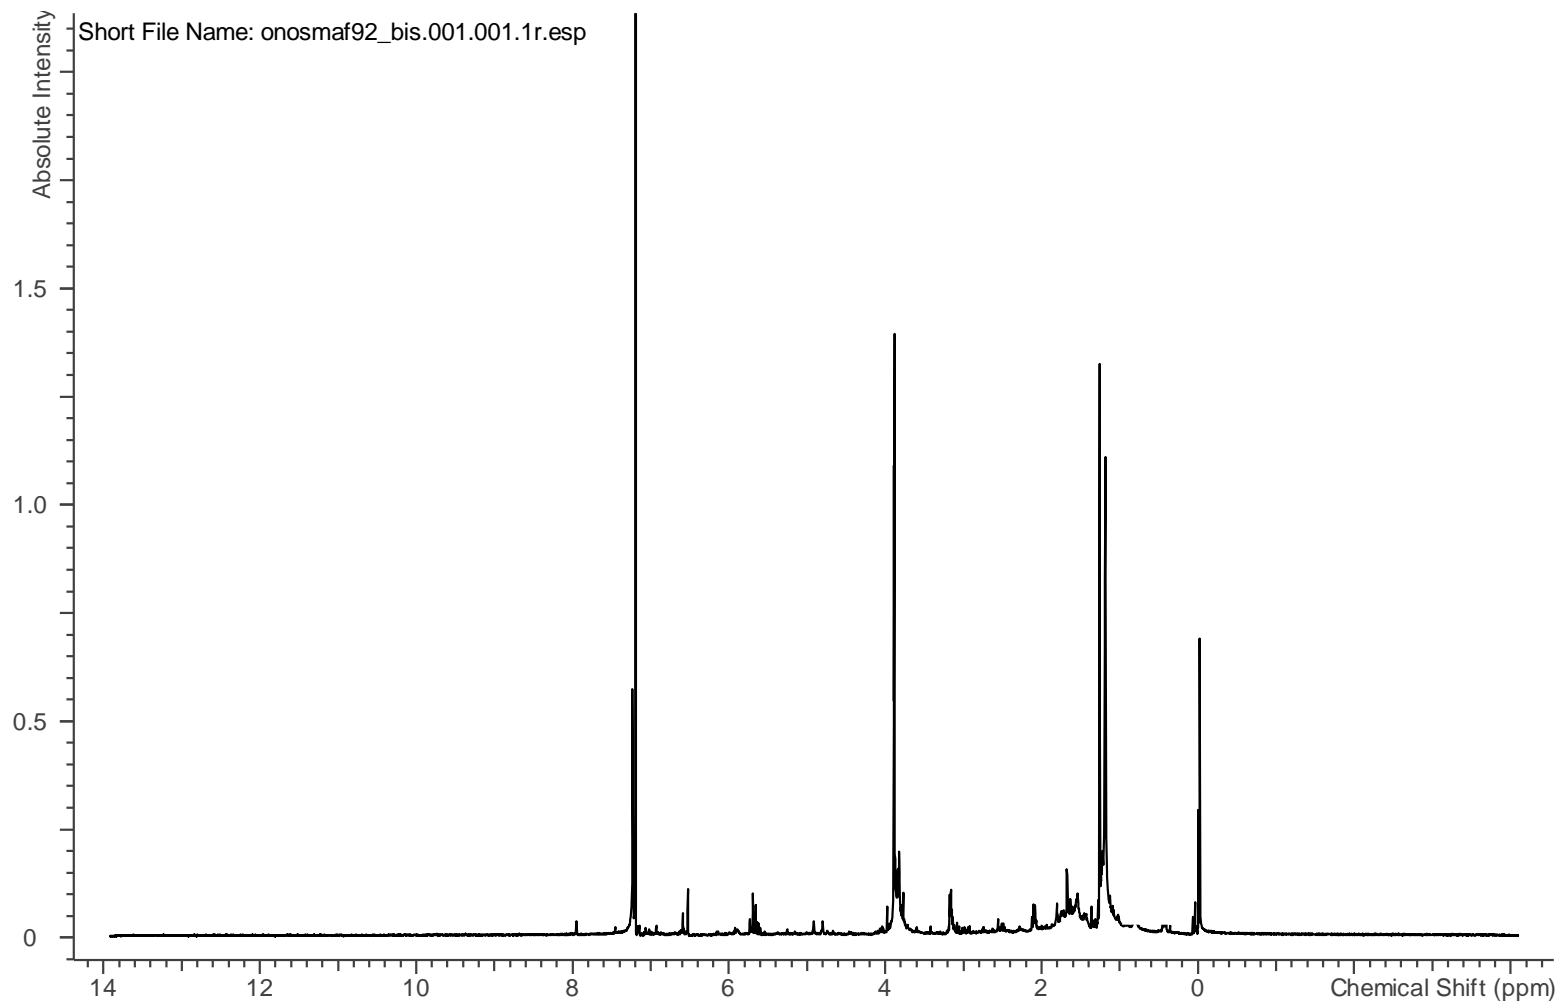

H-NMR of compound 8

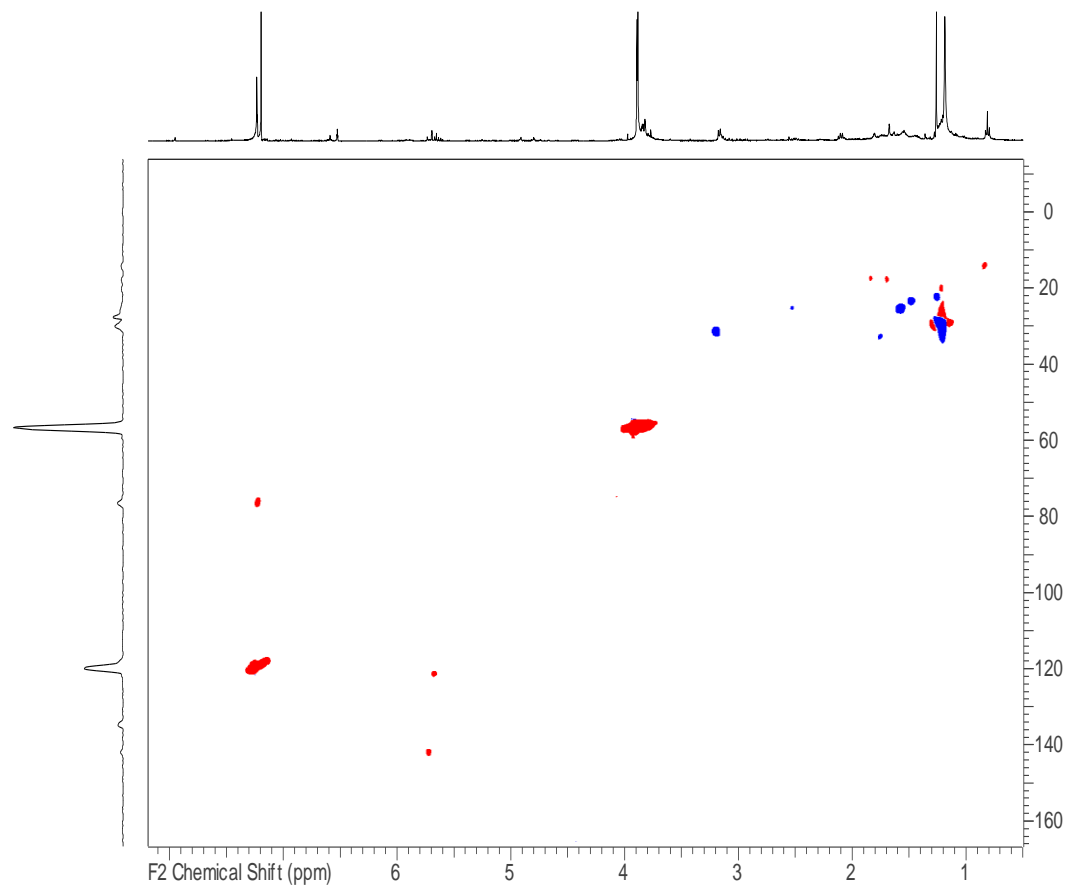

HSQC of compound 8

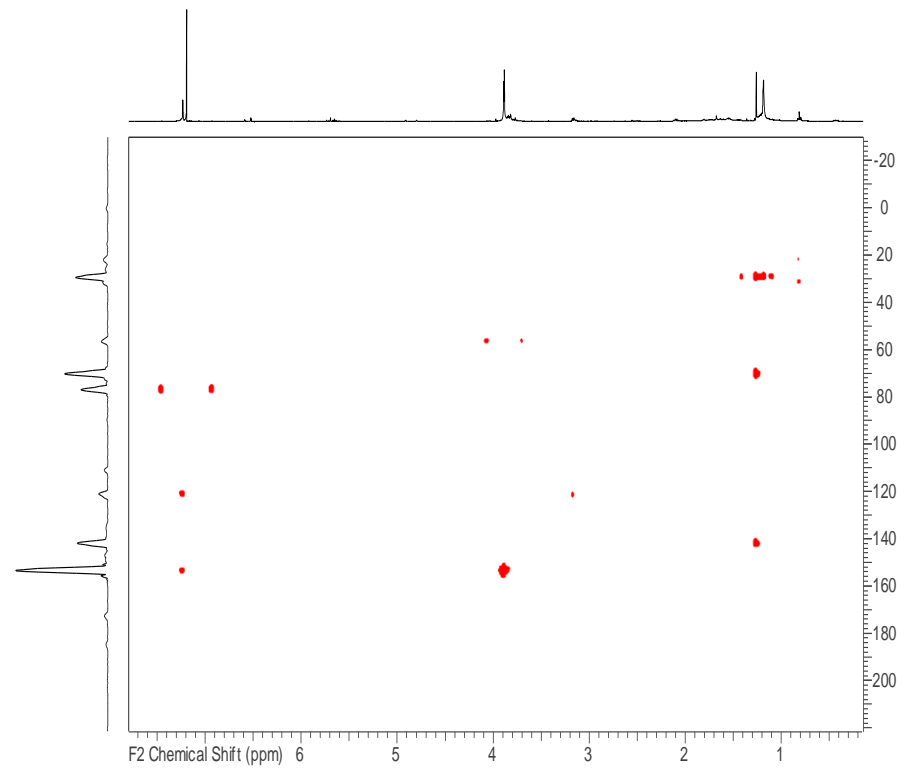

HMBC of compound 8

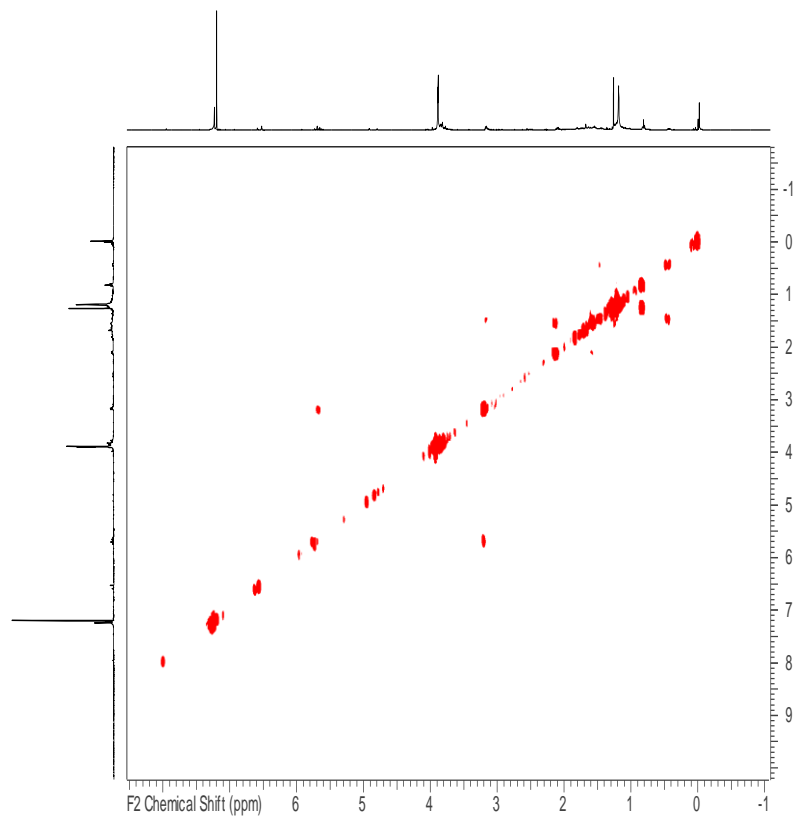

COSY of compound 8

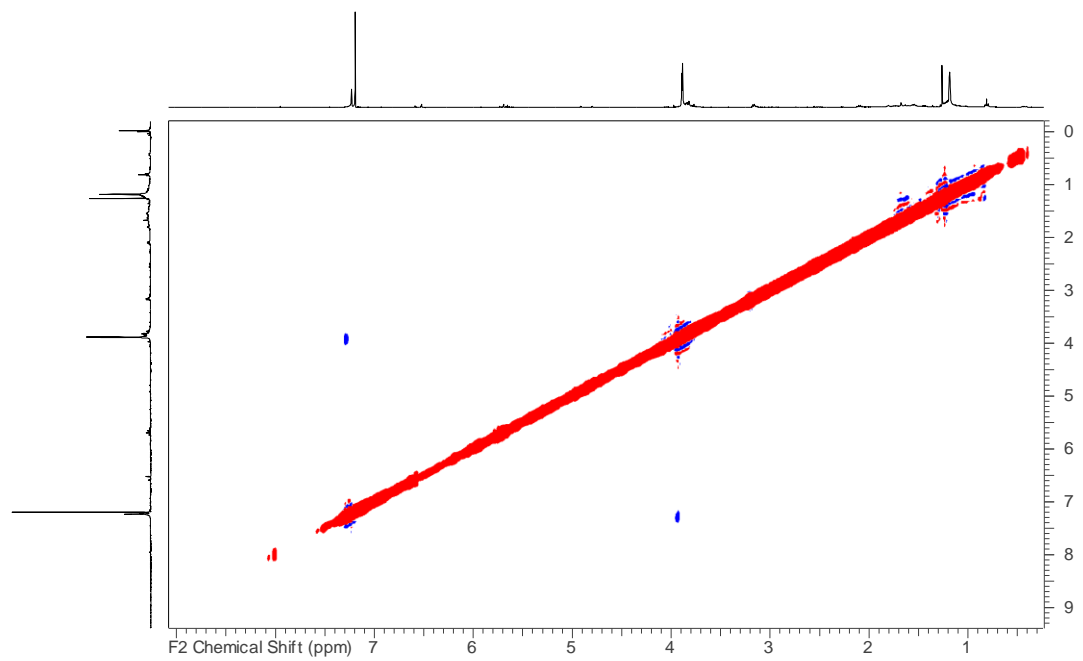

NOESY of compound 8

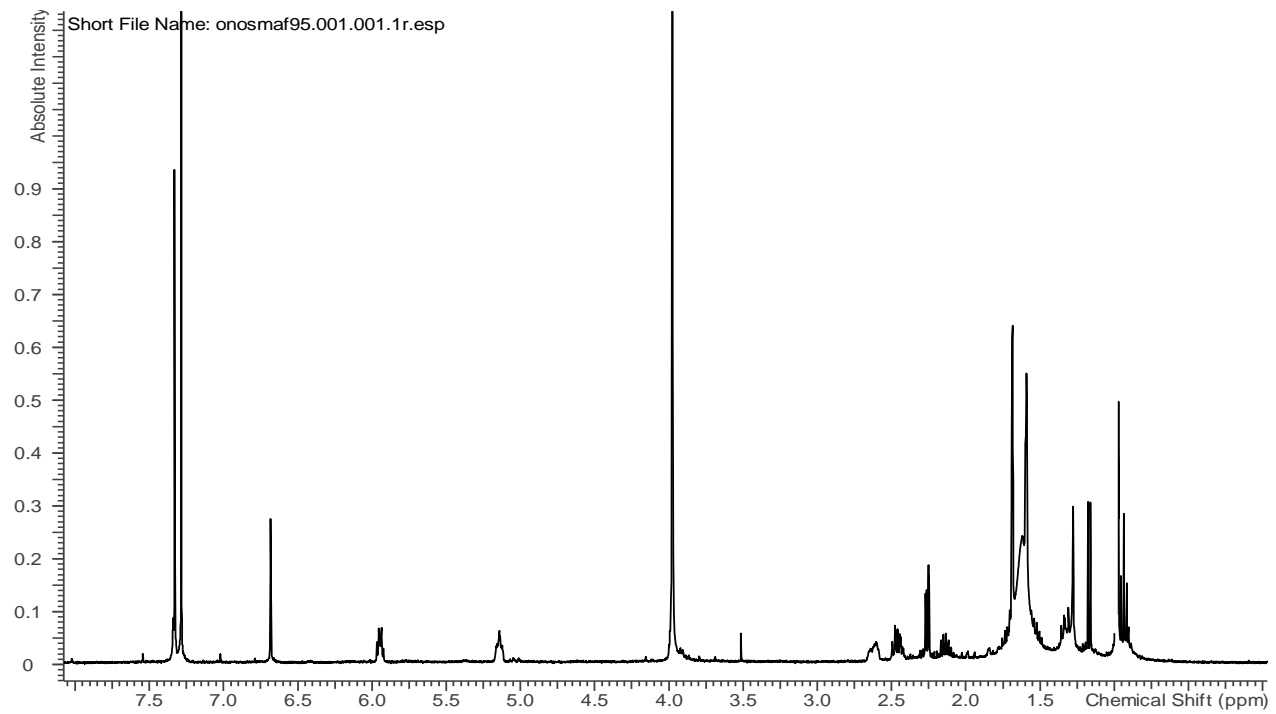

H-NMR of compound 11

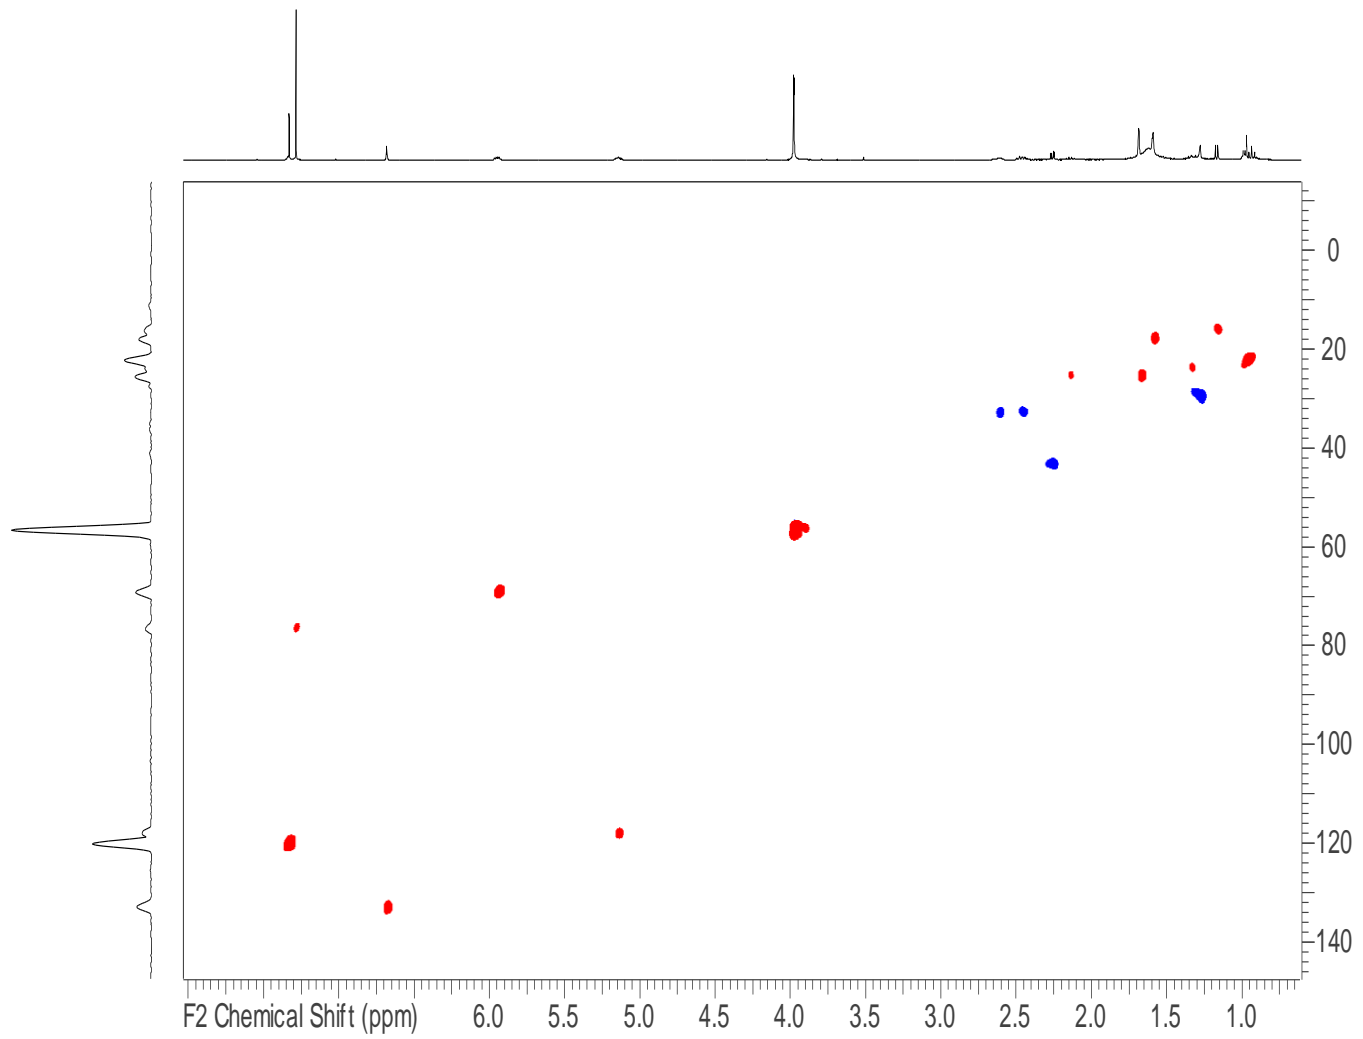

HSQC of compound 11

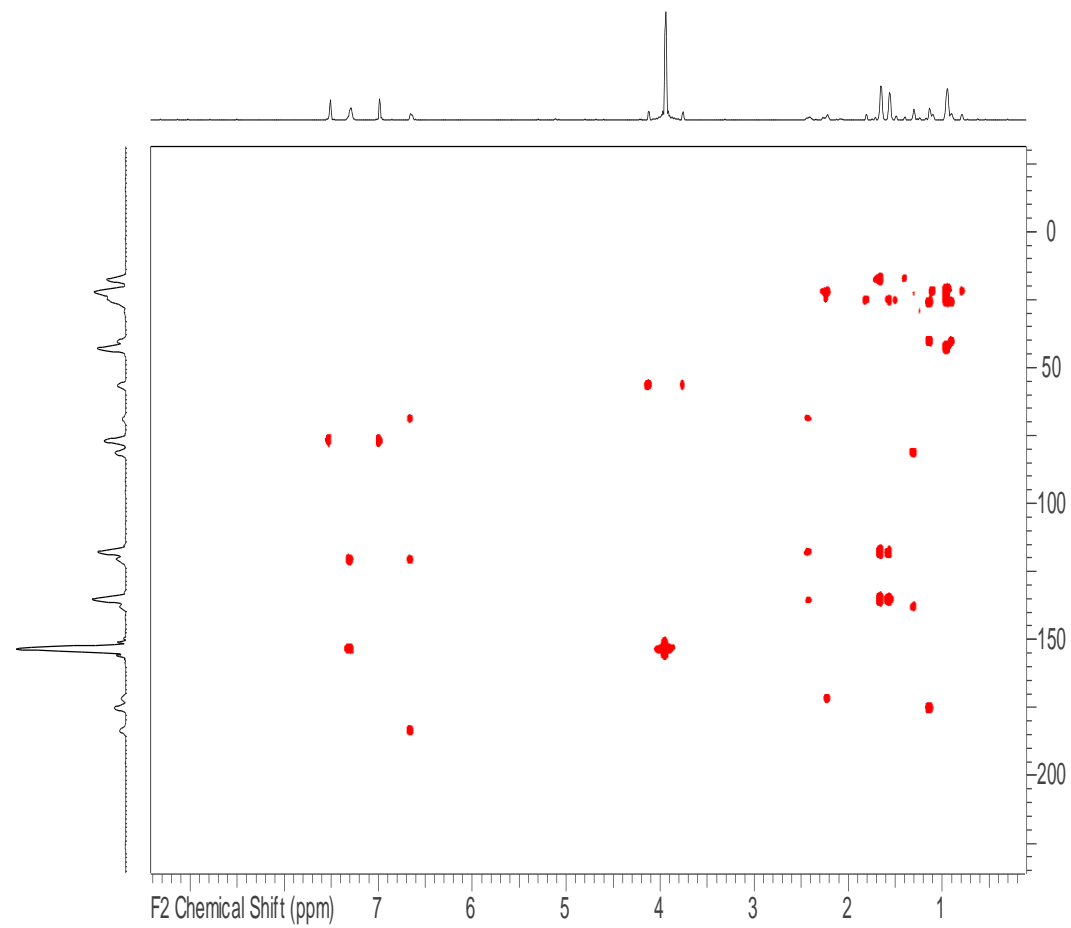

HMBC of compound 11



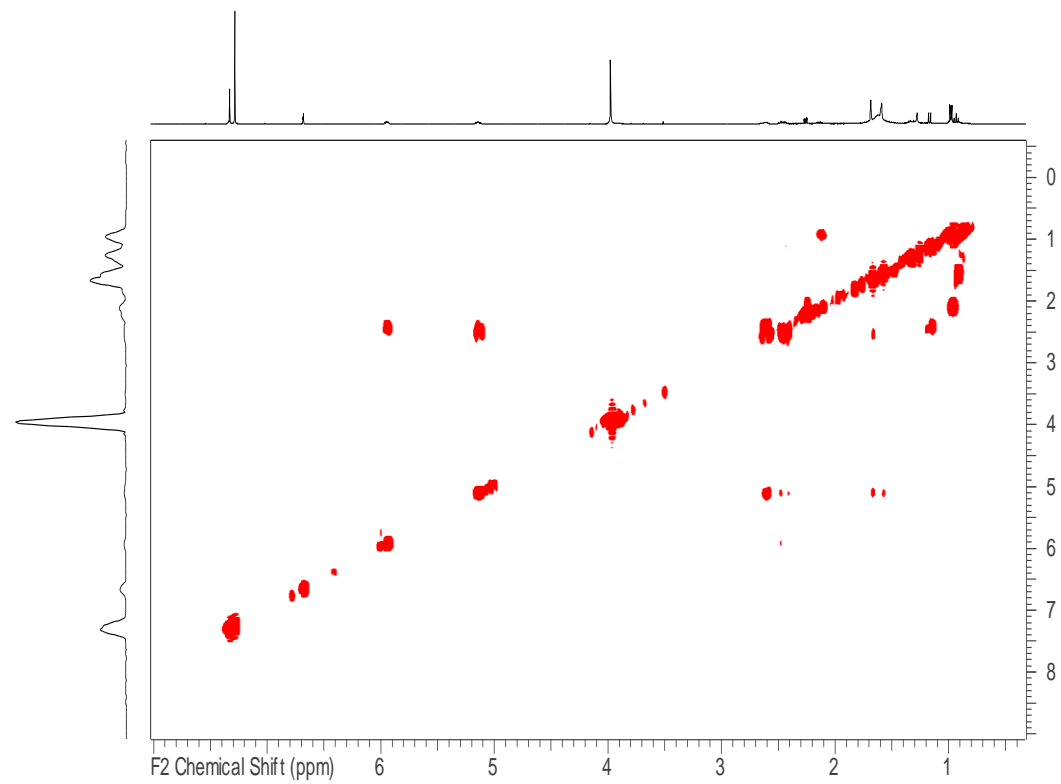

COSY of compound 11

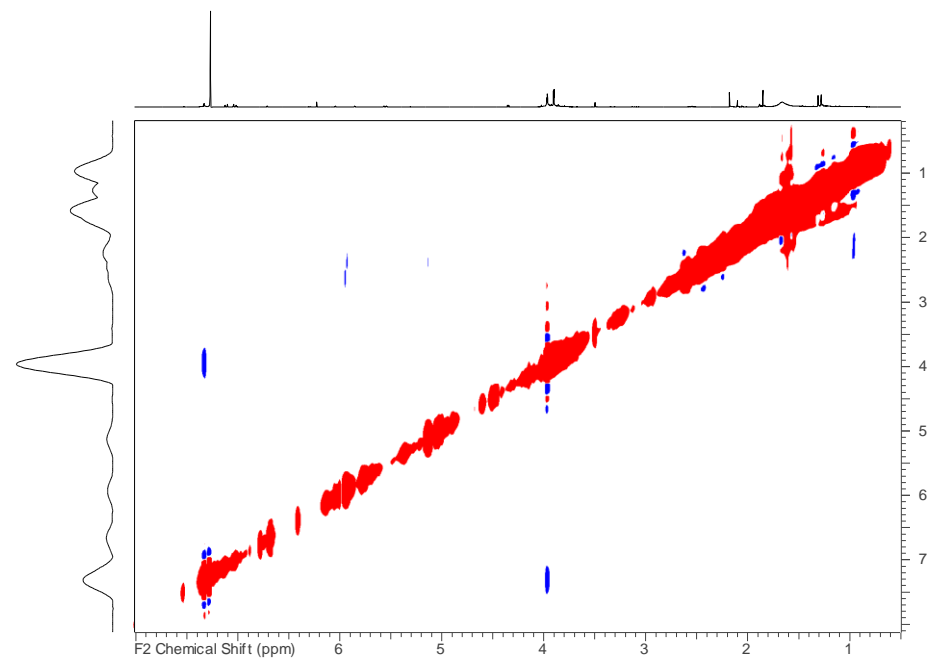

NOESY of compound 11
